# Supplementary material for: Short-wave near-infrared emissive GdPO4:Nd3+theranostic probe forin vivobioimaging beyond 1300 nm
Source: Royal Society of Chemistry journal article supplement (doi:10.1039/c7ra12864a), 2018-01-01
Supplement: c7ra12864a1.pdf [file c7ra12864a1.pdf]

## Supporting Information

### **Short-wave near-infrared emissive GdPO<sub>4</sub>:Nd<sup>3+</sup> theranostic probe for *in vivo* bioimaging beyond 1300 nm**

*Qihua Yang,<sup>a</sup> Xiaolong Li,<sup>a</sup> Zhenluan Xue,<sup>a</sup> Mingyang Jiang,<sup>a</sup> Youbin Li,<sup>a</sup>  
Songjun Zeng,<sup>\*a</sup>*

<sup>a</sup> College of Physics and Information Science, Key Laboratory of Low-dimensional Quantum Structures and Quantum Control of the Ministry of Education, Synergetic Innovation Center for Quantum Effects and Applications, Hunan Normal University, Changsha, 410081, Hunan, China.

Email: [songjunz@hunnu.edu.cn](mailto:songjunz@hunnu.edu.cn)

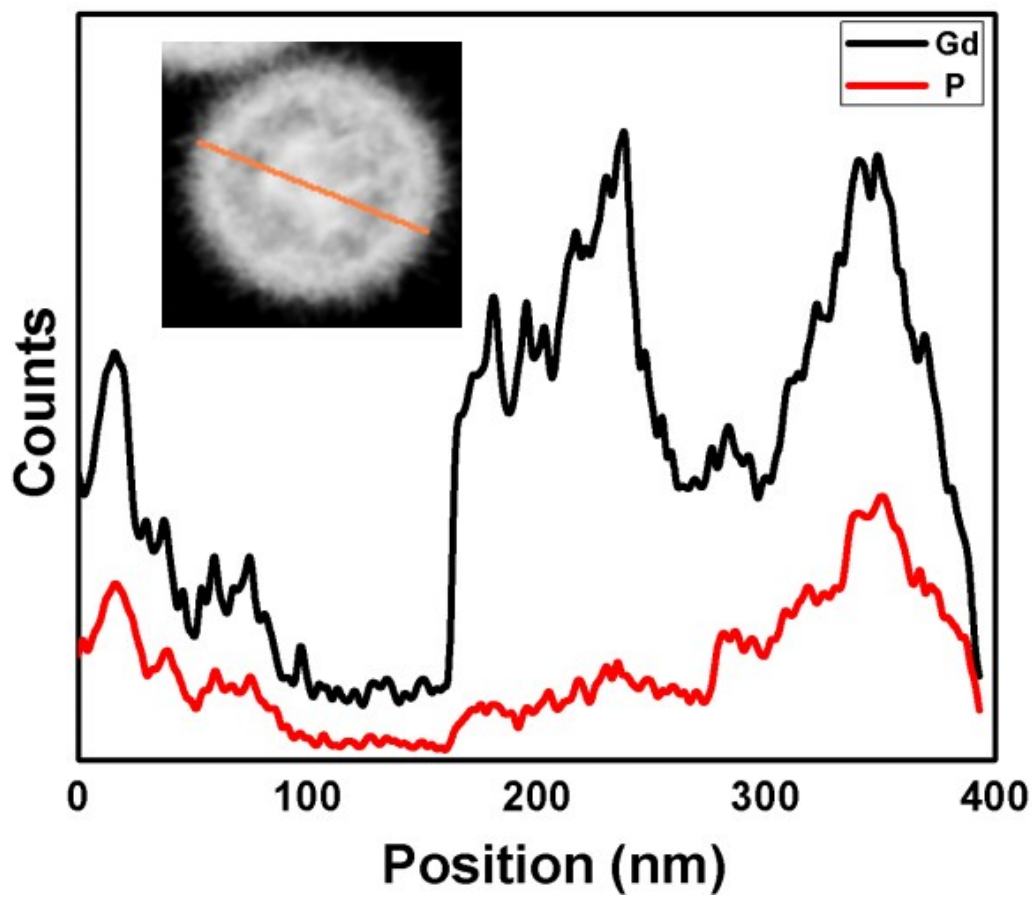

**Fig S1** The EDS line scan along the line in the STEM image (inset) of  $\text{GdPO}_4:\text{Nd}^{3+}$ .

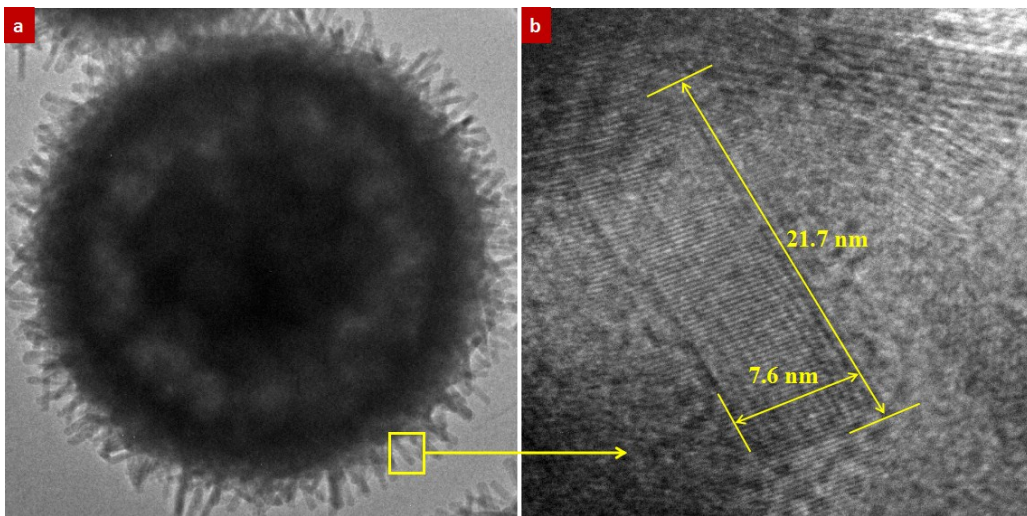

**Fig. S2** TEM images of  $\text{GdPO}_4:\text{Nd}^{3+}$ : (a) the high-magnification TEM image; (b) the high-resolution TEM image taken from yellow rectangle of (a).

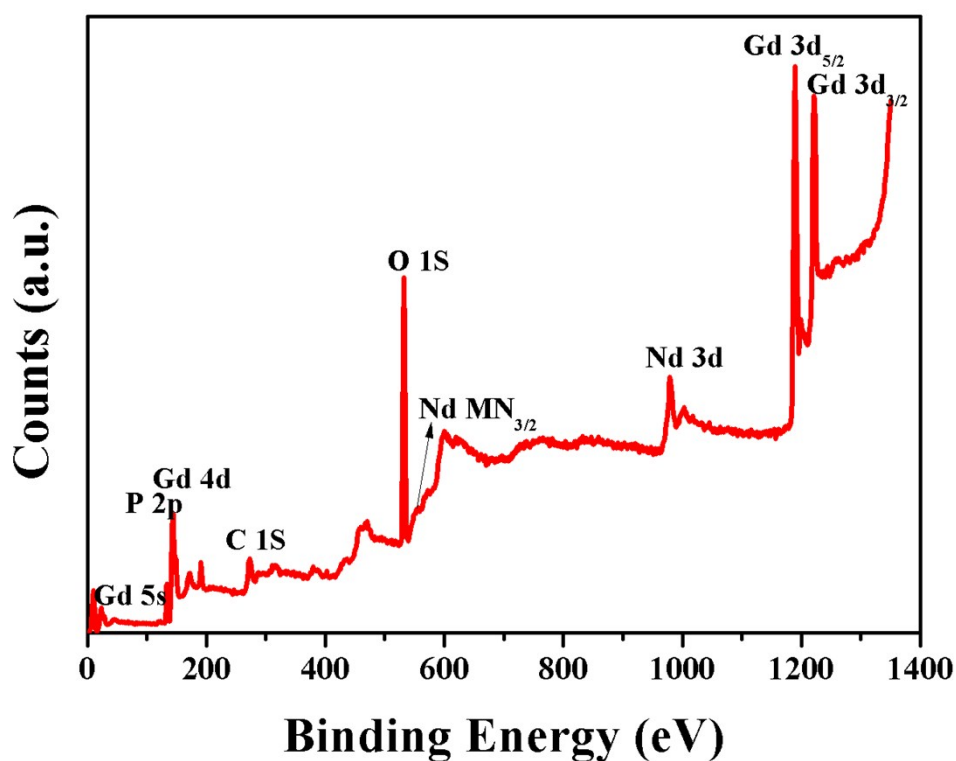

**Fig. S3** The XPS spectra of the as-synthesized GdPO<sub>4</sub>: 2% Nd<sup>3+</sup>. The 5s level of Gd at 38 eV, 2p level of P at 142 eV, 4d level of Gd at 143 eV, 1s level of C at 286.6 eV, 1s level of O at 532 eV, MN<sub>3/2</sub> level of Nd at 556 eV, 3d<sub>5/2</sub> and 3d<sub>3/2</sub> levels of Nd at 979 and 1003 eV, 3d<sub>5/2</sub> and 3d<sub>3/2</sub> level of Gd at 1189 and 1221 eV.

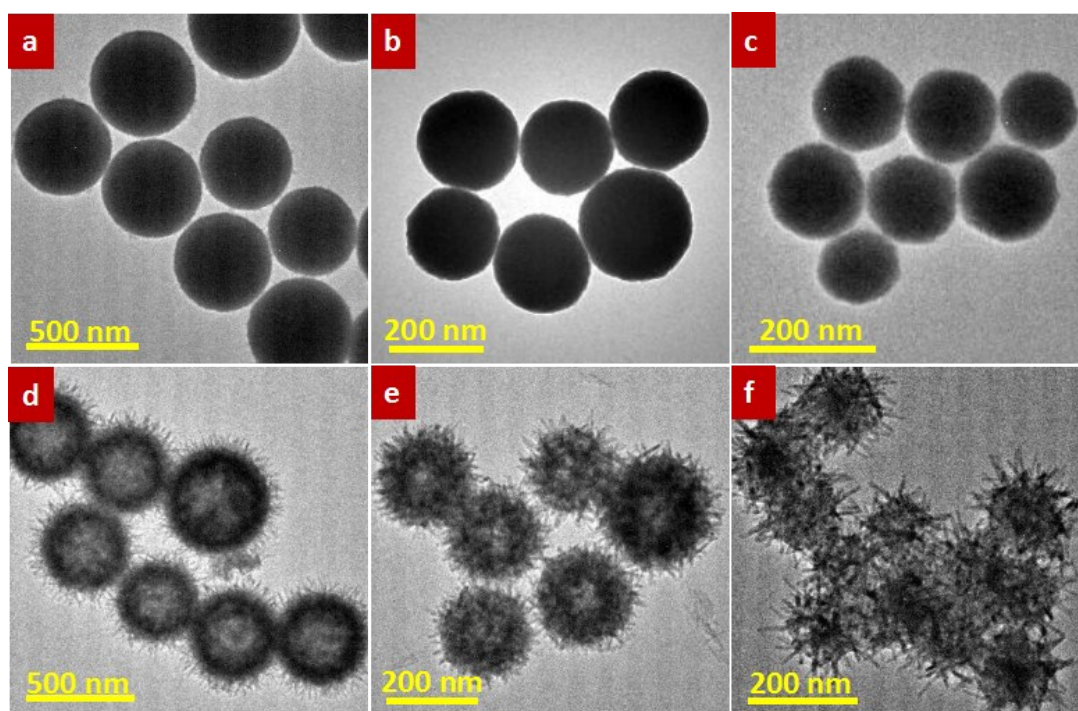

**Fig. S4** The typical TEM images of the as-prepared samples: (a) and (d) are  $\text{Gd}(\text{OH})\text{CO}_3: 2\% \text{Nd}^{3+}$  precursor and  $\text{GdPO}_4: 2\% \text{Nd}^{3+}$  samples with size of 380-410 nm, respectively; (b) and (e) are  $\text{Gd}(\text{OH})\text{CO}_3: 2\% \text{Nd}^{3+}$  precursor and  $\text{GdPO}_4: 2\% \text{Nd}^{3+}$  samples with size of 200-220 nm, respectively; (c) and (f) are  $\text{Gd}(\text{OH})\text{CO}_3: 2\% \text{Nd}^{3+}$  precursor and  $\text{GdPO}_4: 2\% \text{Nd}^{3+}$  samples with size of 110-150 nm, respectively.

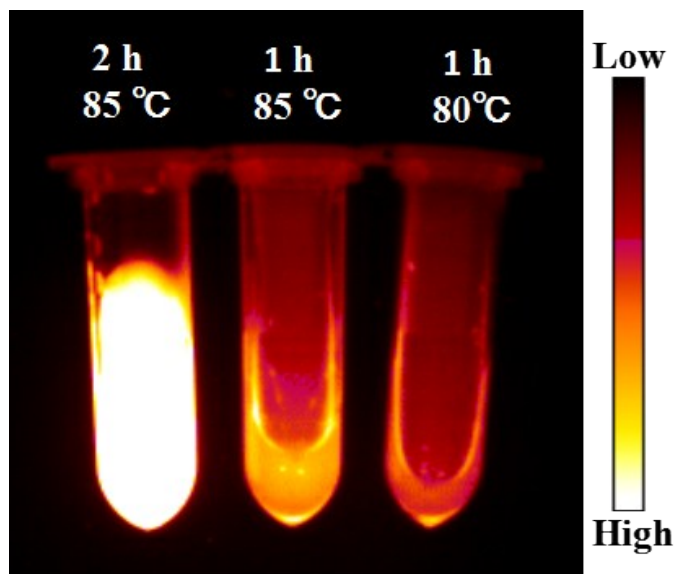

**Fig. S5** *In vitro* phantom NIR-II imaging of the GdPO<sub>4</sub>: 2% Nd<sup>3+</sup> solution with different size under the excitation of 808 nm laser. left: 380-410 nm, middle: 200-220 nm, right: 110-150 nm.

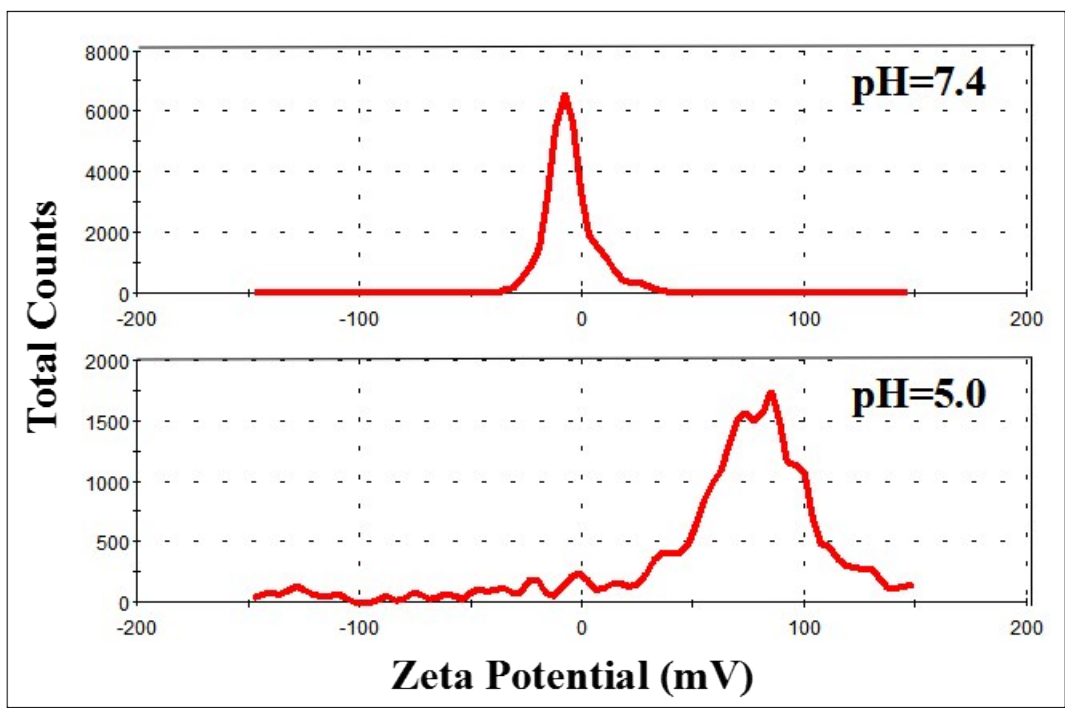

**Fig. S6** Zeta potential of  $\text{GdPO}_4:\text{Nd}^{3+}$  under different pH values.
